# Supplementary material for: IL-4/IL-13 Axis in Allergic Rhinitis: Elevated Serum Cytokines Levels and Inverse Association With Tight Junction Molecules Expression
Source: PubMed Central journal article supplement (PMC8969661; doi:10.3389/fmolb.2022.819772), 2022-03-17

# Supplementary Figure S1

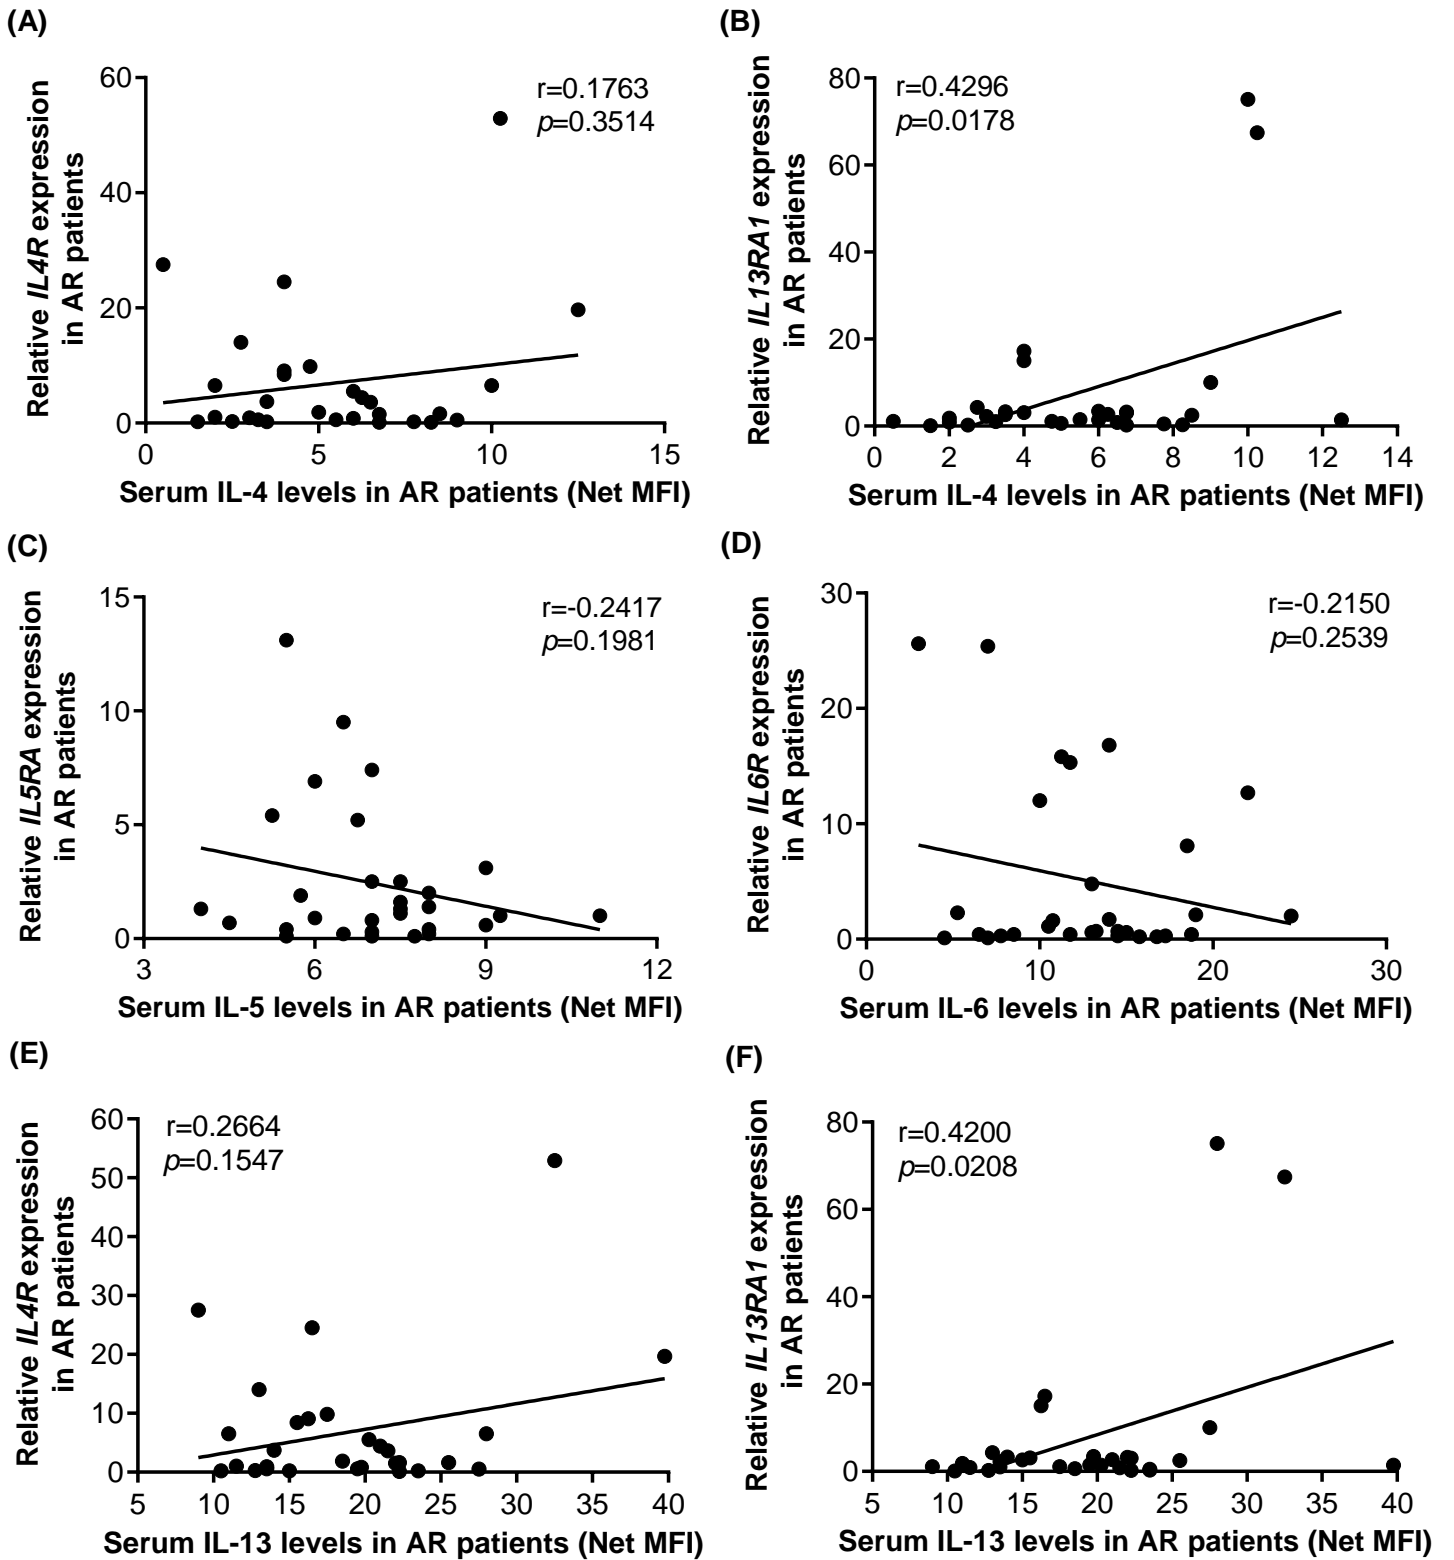

## Supplementary Figure S2

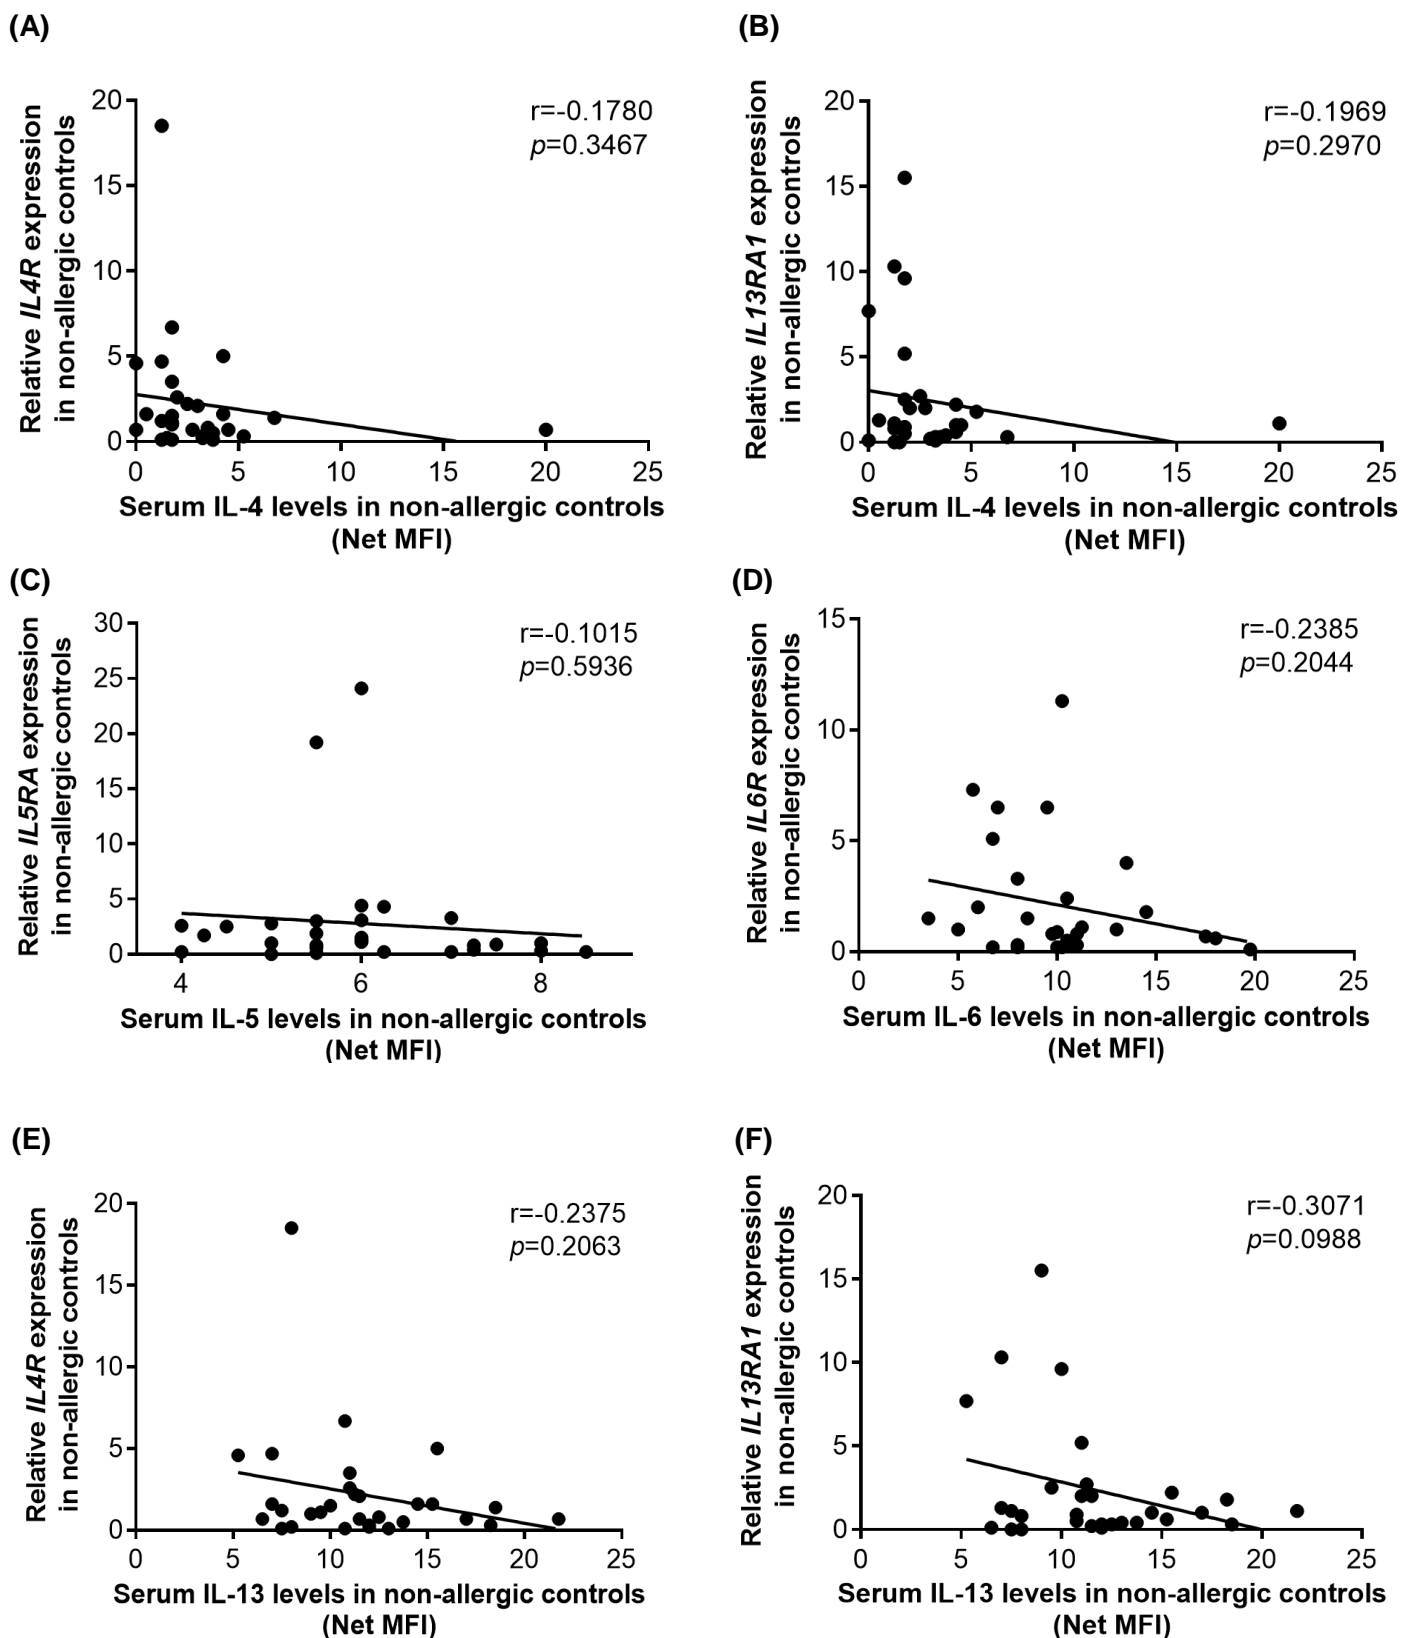

Supplementary Figure S3

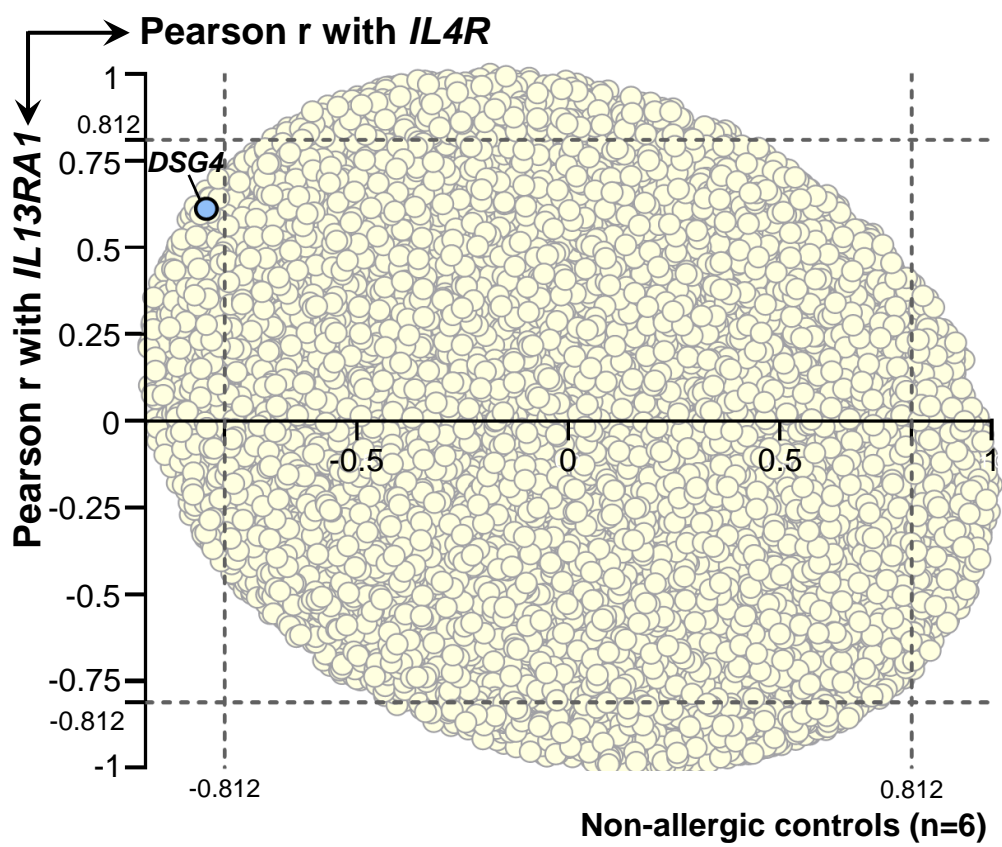

Supplementary Figure S4

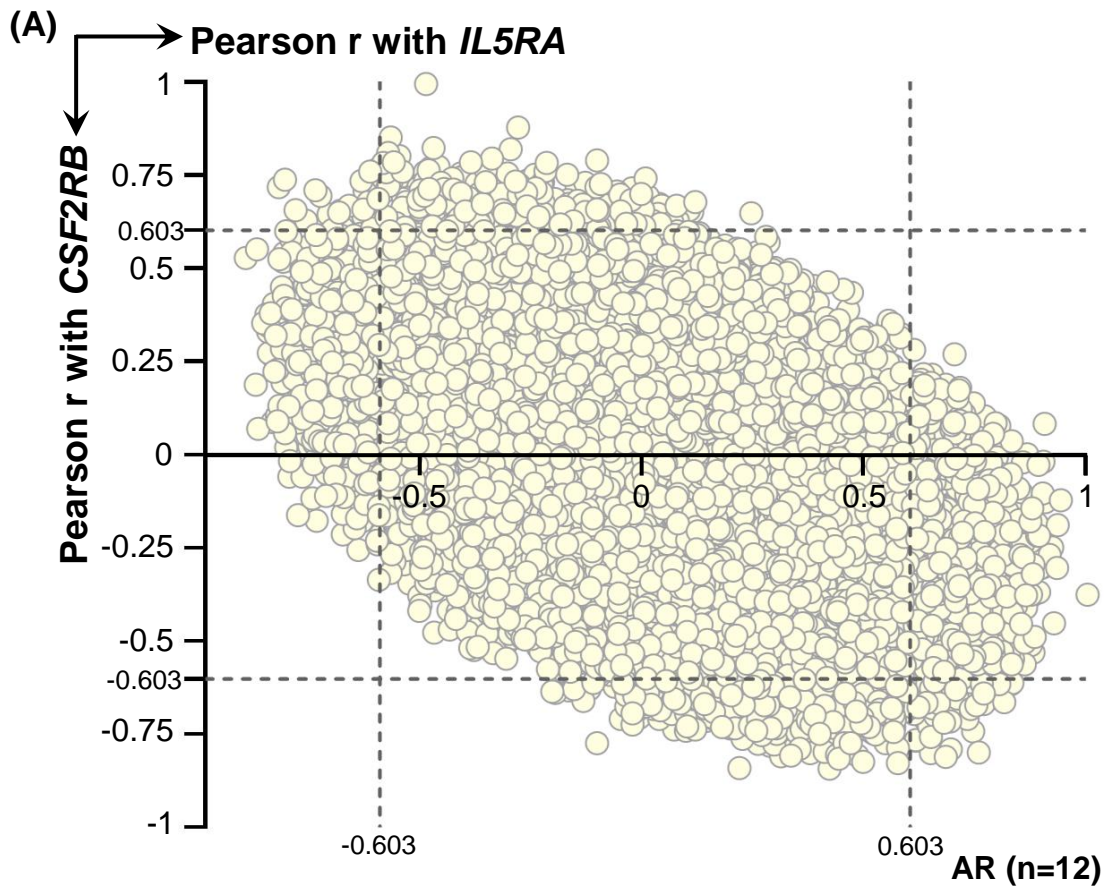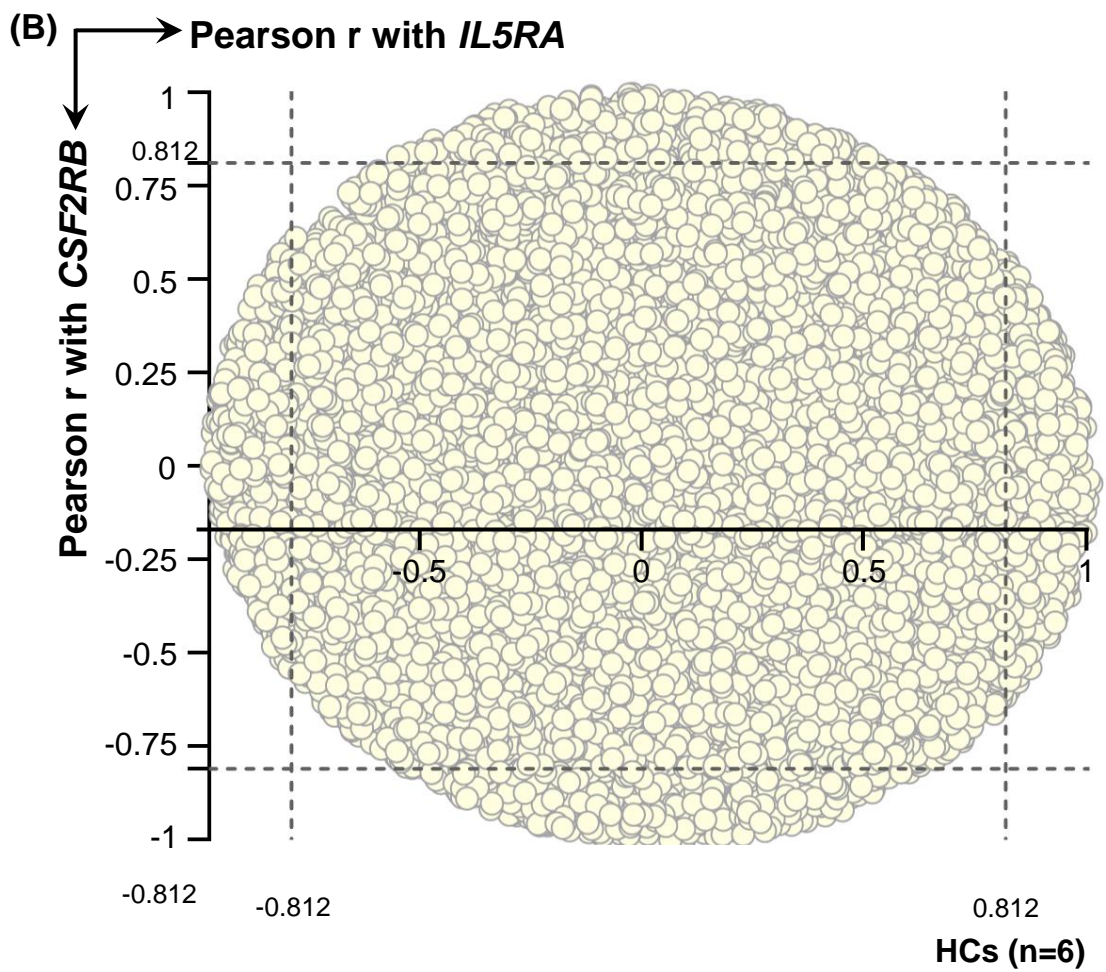



Supplementary Figure S5

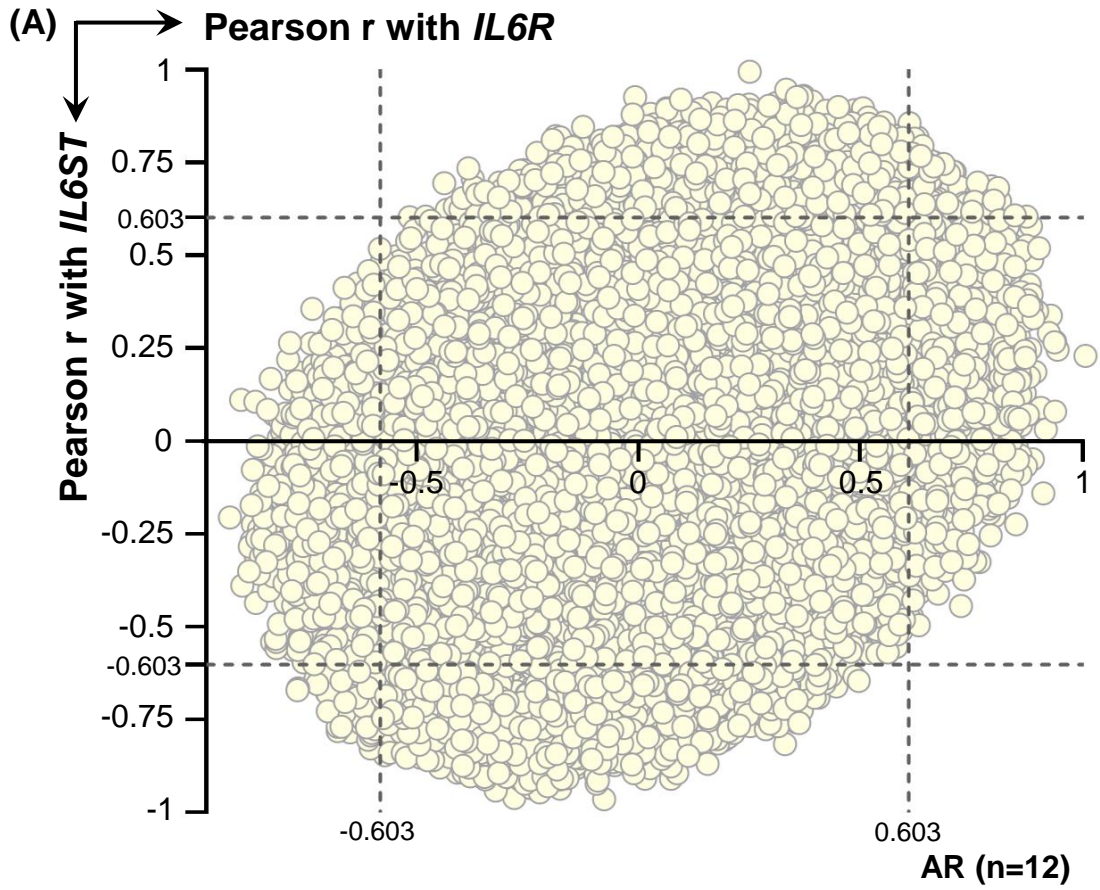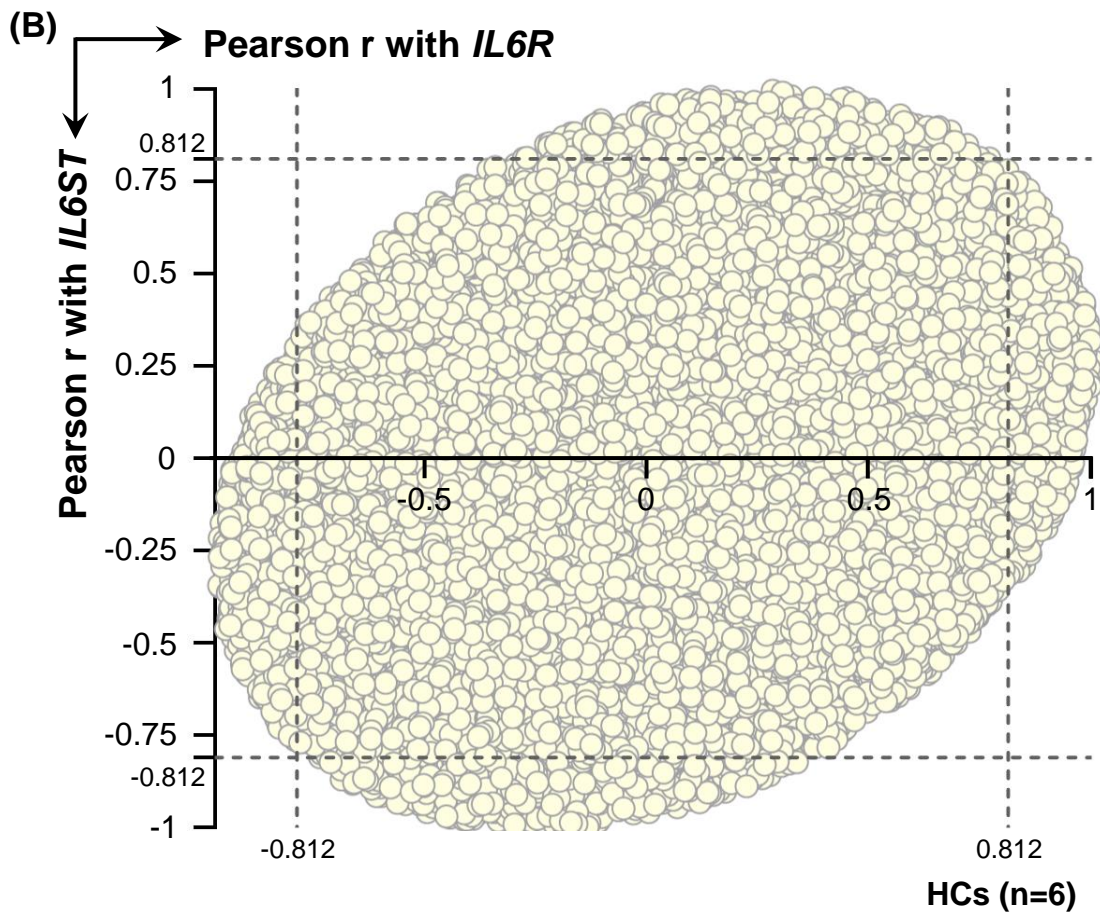



# Supplementary Figure S6

(A)

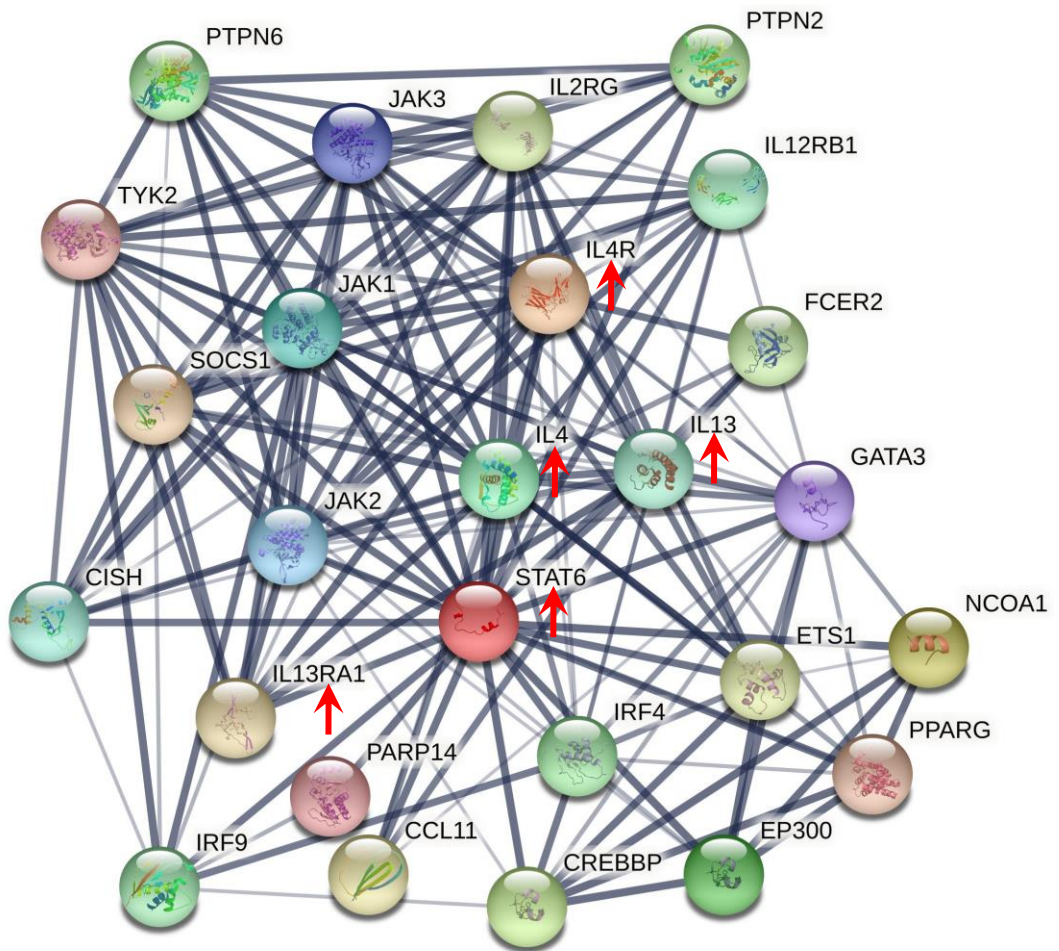

(B)

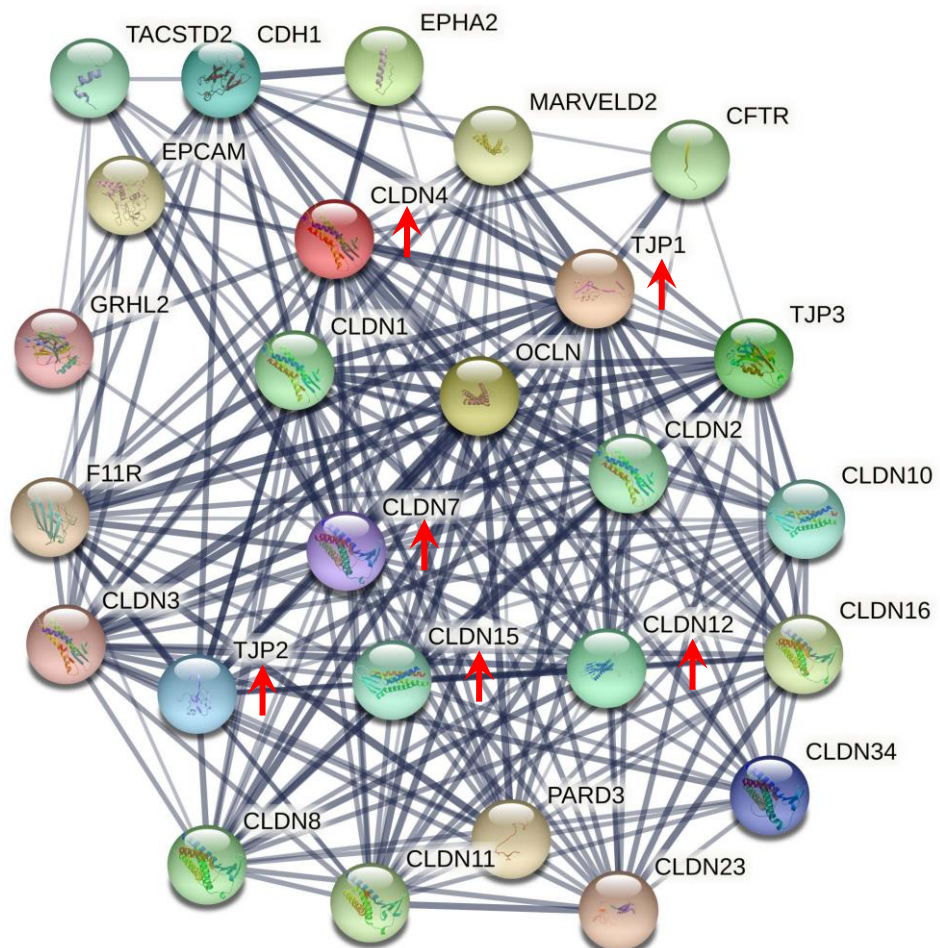

Supplement: DataSheet3.pdf [file DataSheet3.pdf]
